# Supplementary material
Source: Royal Society of Chemistry journal article supplement (doi:10.1039/d5cp04972e)
Supplement: d5cp04972e1.pdf [file d5cp04972e1.pdf]

## **Electronic Supplementary Information**

# **NIR Electrochromism of Plasmonic Au Nanoporous Structures Based on Surface Oxidation and Reduction Reactions**

Hiroyasu Nishi\* and Itsuki Asada

Faculty of Science, Academic Assembly, University of Toyama, 3190 Gofuku, Toyama

930-8555, Japan

School of Science, University of Toyama, 3190 Gofuku, Toyama 930-8555, Japan.

e-mail: [nishi@sci.u-toyama.ac.jp](mailto:nishi@sci.u-toyama.ac.jp)

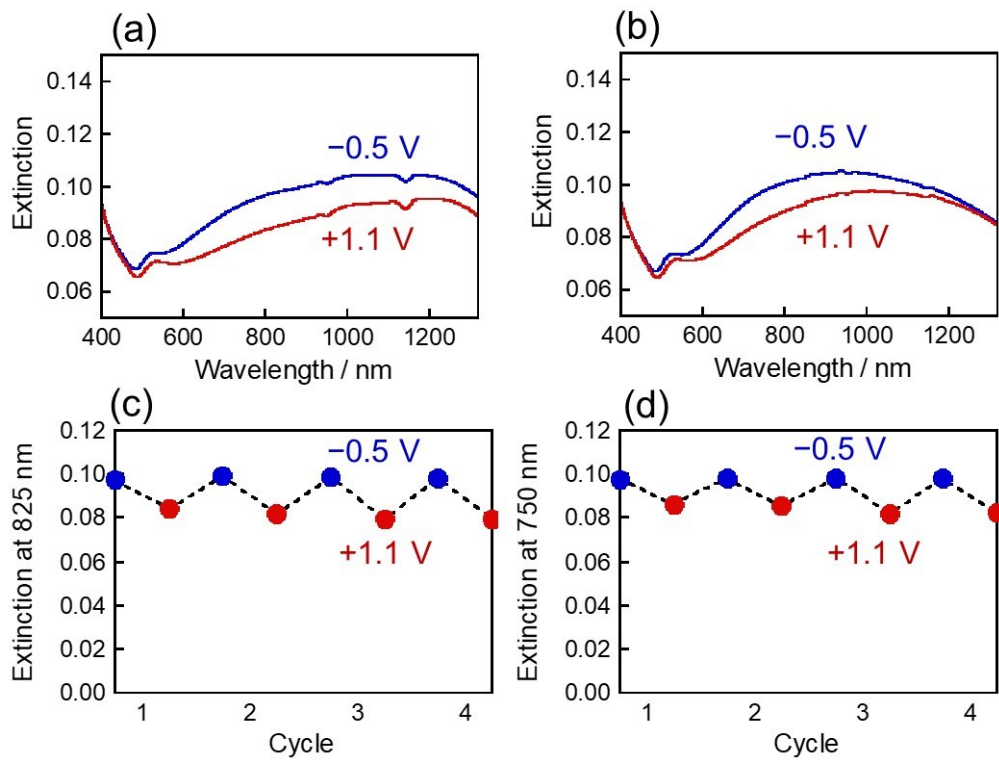

**Fig. S1** Extinction spectra at  $-0.5$  V and  $+1.1$  V in  $0.01$  M potassium nitrate and extinction changes over 4 cycles between the reduced state ( $-0.5$  V) and the oxidized state ( $+1.1$  V). The data are for the nanoporous structures fabricated with (a, c)  $0.4$  mM and (b, d)  $0.1$  mM of L-cysteine.

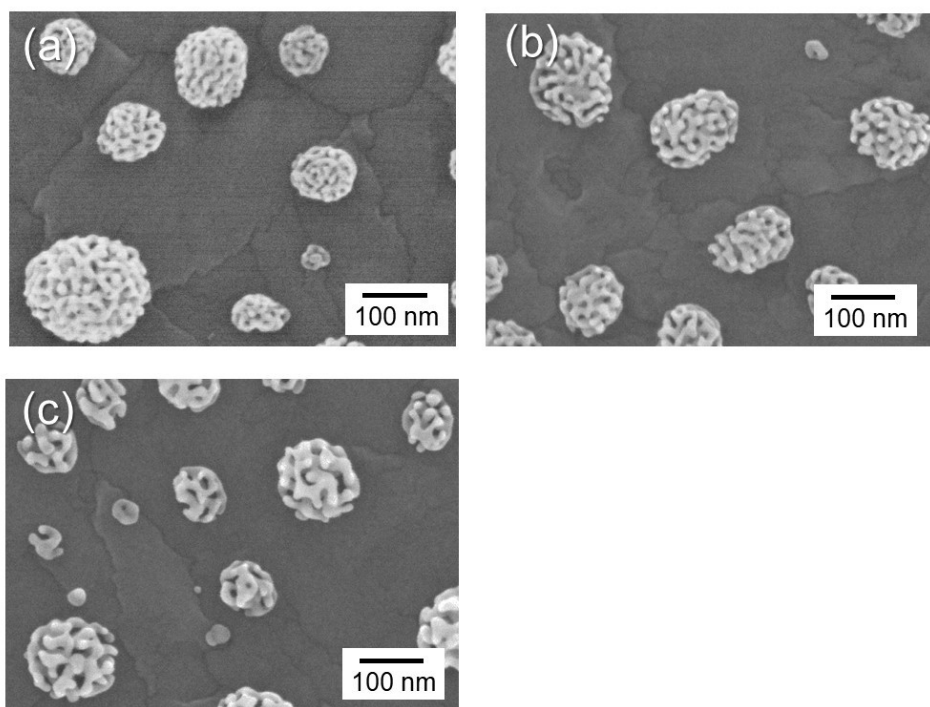

**Fig. S2** SEM images of nanoporous structures fabricated by dealloying in dilute nitric acid containing (a) 0.8, (b) 0.4, and (c) 0.1 mM of L-cysteine after spectroelectrochemical measurements.

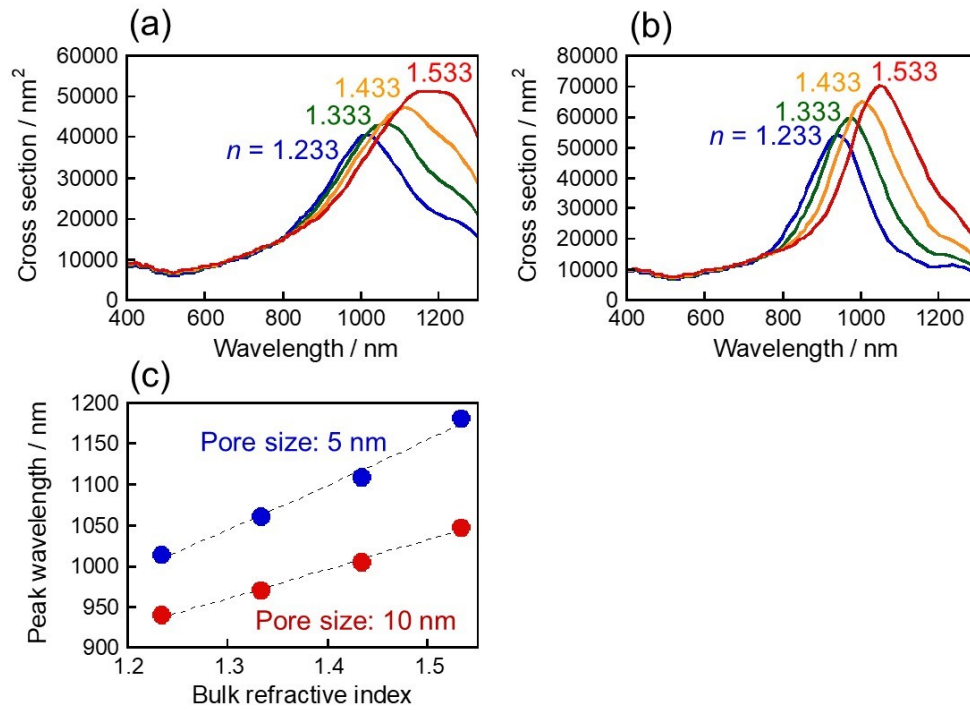

**Fig. S3** Calculated extinction spectra of nanoporous structures with pore sizes of (a) 5 nm and (b) 10 nm in different bulk refractive indices ( $n$ ). (c) Relationship between bulk refractive index and peak wavelength.

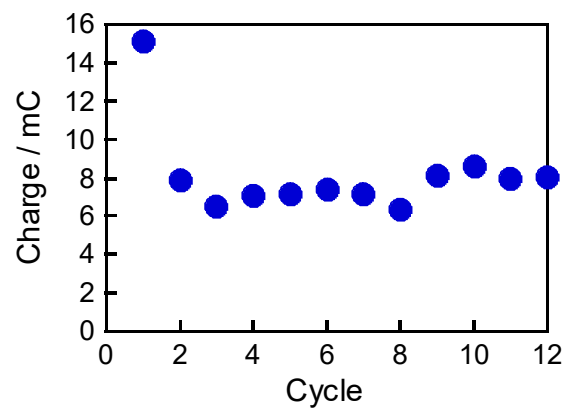

**Fig. S4** Charge passed during the oxidation process over 12 cycles between the reduced state ( $-0.5$  V) and the oxidized state ( $+1.1$  V).
